# Supplementary material for: Terminal Parent Phosphanide and Phosphinidene Complexes of Zirconium(IV)
Source: PubMed Central journal article supplement (PMC5575506; doi:10.1002/anie.201703870), 2017-05-26
Supplement: ANIE-56-7669-s001.pdf [file ANIE-56-7669-s001.pdf]

## Supporting Information

### **Terminal Parent Phosphanide and Phosphinidene Complexes of Zirconium(IV)**

*Hannah Stafford, Thomas M. Rookes, Elizabeth P. Wildman, Gábor Balázs, Ashley J. Wooles, Manfred Scheer,\* and Stephen T. Liddle\**

anie\_201703870\_sm\_miscellaneous\_information.pdf

## Experimental

### *General*

All manipulations were carried out using Schlenk techniques, or an MBraun UniLab glovebox, under an atmosphere of dry nitrogen. Solvents were dried by passage through activated alumina towers and degassed before use or were distilled from calcium hydride. All solvents were stored over potassium mirrors except ethers which were stored over activated 4 Å sieves. Deuterated solvent was distilled from potassium, degassed by three freeze-pump-thaw cycles and stored under nitrogen.  $[\text{Zr}(\text{Tren}^{\text{DMBS}})(\text{Cl})]$  [**Zr1**;  $\text{Tren}^{\text{DMBS}} = \{\text{N}(\text{CH}_2\text{CH}_2\text{NSiMe}_2\text{Bu}^t)_3\}$ ],  $\text{NaPH}_2$ , and  $[\text{KCH}_2\text{C}_6\text{H}_5]$  were prepared as described previously.<sup>1-3</sup> Benzo-15-crown-5 ether (B15C5) was dissolved in ether, dried over 4 Å sieves, decanted and solvent removed prior to use.

$^1\text{H}$ ,  $^{13}\text{C}$ ,  $^{29}\text{Si}$ , and  $^{31}\text{P}$  NMR spectra were recorded on a Bruker 400 spectrometer operating at 400.2, 100.6, 79.5, and 162.0 MHz respectively; chemical shifts are quoted in ppm and are relative to TMS ( $^1\text{H}$ ,  $^{13}\text{C}$ ,  $^{29}\text{Si}$ ) and 85%  $\text{H}_3\text{PO}_4$  ( $^{31}\text{P}$ ). FTIR spectra were recorded on a Bruker Tensor 27 spectrometer. UV/Vis/NIR spectra were recorded on a Perkin Elmer Lambda 750 spectrometer. Data were collected in 1mm path length cuvettes loaded in an MBraun UniLab glovebox and were run versus the appropriate reference solvent. CHN microanalyses were carried out by Mr M Jennings at the micro analytical service at the University of Manchester.

### *Preparation of $[\text{Zr}(\text{Tren}^{\text{DMBS}})\text{PH}_2]$ (**Zr2**)*

THF (20 ml) was added to a pre-cooled ( $-78\text{ }^\circ\text{C}$ ) mixture of **Zr1** (2.45 g, 4.0 mmol) and  $\text{NaPH}_2$  (0.24 g, 4.4 mmol). The resulting pale orange slurry was allowed to warm to room temperature and stirred for 40 hours to afford a pale orange solution. The solvent was

removed *in vacuo* and the product was extracted into pentane and filtered yielding a brown solution. Removal of pentane afforded a dark yellow solid. Yield: 1.33 g, 54.5%. Crystals suitable for X-ray diffraction experiments were obtained from a concentrated pentane solution (2 ml) stored at  $-30\text{ }^{\circ}\text{C}$  for 16 hrs.  $^1\text{H}$  NMR ( $\text{C}_6\text{D}_6$ , 298 K):  $\delta$  0.32 (s, 18H,  $\text{SiCH}_3$ ), 1.08 (s, 27H,  $\text{SiC}(\text{CH}_3)_3$ ), 1.63 (d,  $J_{\text{PH}} = 166.3\text{ Hz}$ , 2H,  $\text{PH}_2$ ), 2.12 (t,  $^3J_{\text{HH}} = 4.77\text{ Hz}$ , 6H,  $\text{CH}_2\text{CH}_2$ ), 3.31 (t,  $^3J_{\text{HH}} = 4.95\text{ Hz}$ , 6H,  $\text{CH}_2\text{CH}_2$ ).  $^{13}\text{C}\{^1\text{H}\}$  NMR ( $\text{C}_6\text{D}_6$ , 298 K):  $\delta$   $-3.27$  ( $\text{Si}(\text{CH}_3)_3$ ), 21.32 ( $\text{C}(\text{CH}_3)_3$ ), 27.35 ( $\text{C}(\text{CH}_3)_3$ ), 48.38 ( $\text{CH}_2\text{CH}_2$ ), 63.42 ( $\text{CH}_2\text{CH}_2$ ).  $^{29}\text{Si}\{^1\text{H}\}$  NMR ( $\text{C}_6\text{D}_6$ , 298 K):  $\delta$  2.46 (s,  $\text{Si}(\text{CH}_3)_2\text{C}(\text{CH}_3)_3$ ).  $^{31}\text{P}$  NMR ( $\text{C}_6\text{D}_6$ , 298 K):  $\delta$   $-175.28$  (t,  $J_{\text{PH}} = 166.6\text{ Hz}$ ,  $\text{PH}_2$ ). FTIR ( $\tilde{\nu}$ ,  $\text{cm}^{-1}$ ): 2951 (w), 2924 (w), 2887 (w), 2849 (w), 2288 (br), 1463 (w), 1256 (w), 1049 (m), 925 (s), 799 (s), 778 (s), 723 (s), 663 (m), 567 (m), 471 (m). Anal. calc'd for  $\text{C}_{24}\text{H}_{59}\text{N}_4\text{PSi}_3\text{Zr}\cdot 0.2\text{C}_5\text{H}_{12}$ : C, 48.07; H, 9.91; N, 8.97. Found: C, 47.68; H, 10.33; N, 9.14.

#### ***Preparation of $[\text{Zr}(\text{Tren}^{\text{DMBS}})(\text{PH})][\text{K}(\text{B15C5})_2]$ (Zr3)***

A solution of benzyl potassium (0.07 g, 0.52 mmol) and benzo-15-crown-5 (0.28 g, 1.04 mmol) in THF (10 ml) was added to a cold ( $-78\text{ }^{\circ}\text{C}$ ) solution of **Zr2** (0.32 g, 0.52 mmol) in THF (10 ml). The resulting pale orange slurry was allowed to warm to room temperature and stirred for 16 hours to afford a dark orange solution. Volatiles were removed *in vacuo* and the resulting dark orange solid was recrystallised from a mixture of toluene and HMDSO (3 ml and 0.5 ml). Yield: 0.15 g, 24.0%. Single crystals suitable for X-ray diffraction experiments were grown from a concentrated toluene/HMDSO solution stored at  $5\text{ }^{\circ}\text{C}$  for 16 hrs.  $^1\text{H}$  NMR ( $\text{C}_6\text{D}_6$ , 298 K):  $\delta$  0.78 (s, 18H,  $\text{SiCH}_3$ ), 1.49 (s, 27H,  $\text{SiC}(\text{CH}_3)_3$ ), 2.38 (t,  $^3J_{\text{HH}} = 4.77\text{ Hz}$ , 6H,  $\text{CH}_2\text{CH}_2$ ), 3.3 – 3.56 (m, 32H,  $\text{CH}_2\text{CH}_2\text{O}$ ), 3.58 (t,  $^3J_{\text{HH}} = 4.27\text{ Hz}$ , 6H,  $\text{CH}_2\text{CH}_2$ ), 6.51 (m, 4H,  $\text{ArH}$ ), 6.80 (m, 4H,  $\text{ArH}$ ), 8.53 (d,  $^1J_{\text{HP}} = 173.42\text{ Hz}$ , 1H,  $\text{PH}$ ).  $^{13}\text{C}\{^1\text{H}\}$  NMR ( $\text{C}_6\text{D}_6$ , 298 K):  $\delta$   $-0.37$  ( $\text{Si}(\text{CH}_3)_3$ ), 22.53 ( $\text{C}(\text{CH}_3)_3$ ), 29.18 ( $\text{C}(\text{CH}_3)_3$ ), 48.17 ( $\text{CH}_2\text{CH}_2$ ), 62.23

(CH<sub>2</sub>CH<sub>2</sub>), 68.20 (OCH<sub>2</sub>), 68.85 (OCH<sub>2</sub>), 69.44 (OCH<sub>2</sub>), 70.12 (OCH<sub>2</sub>), 114.24 (Ar-CH), 121.97 (Ar-CH), 148.99 (Ar-C). <sup>29</sup>Si{<sup>1</sup>H} NMR (C<sub>6</sub>D<sub>6</sub>, 298 K): δ 0.32 (s, Si(CH<sub>2</sub>)<sub>2</sub>C(CH<sub>3</sub>)<sub>3</sub>). <sup>31</sup>P NMR (C<sub>6</sub>D<sub>6</sub>, 298 K): δ 246.75 (br, FWHM; 255.87 Hz, PH). FTIR ( $\tilde{\nu}$ , cm<sup>-1</sup>): 2948 (w), 2925 (w), 2876 (w), 2837 (w), 2100 (vw), 1596 (w), 1505 (m), 1453 (w), 1409 (w), 1256 (s), 1122 (s), 1094 (s), 1044 (s), 934 (s), 819 (s), 804 (s), 742 (s), 673 (m), 559 (m), 459 (m). Anal. calc'd for C<sub>52</sub>H<sub>98</sub>KN<sub>4</sub>O<sub>10</sub>PSi<sub>3</sub>Zr·0.8 C<sub>6</sub>H<sub>18</sub>OSi<sub>2</sub>: C, 51.89; H, 8.62; N, 4.26. Found: C, 52.05; H, 8.76; N, 4.10.

### UV/Vis/NIR Electronic Absorption spectra of Zr(2) (top) and Zr(3) (bottom) in toluene

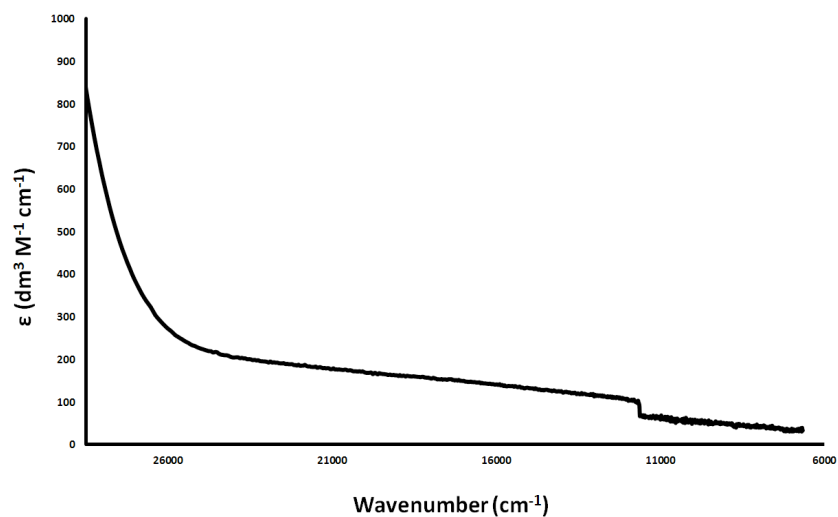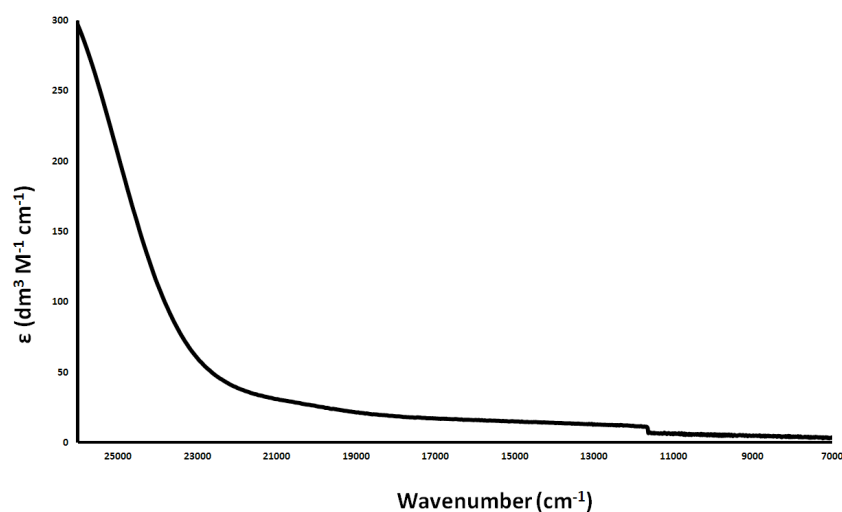

**Table S1. Experimental X-ray crystallographic details for Zr2 and Zr3.**

|                                       | <b>Zr2</b>                                                         | <b>Zr3</b>                                                                          |
|---------------------------------------|--------------------------------------------------------------------|-------------------------------------------------------------------------------------|
| Formula                               | C <sub>24</sub> H <sub>59</sub> N <sub>4</sub> PSi <sub>3</sub> Zr | C <sub>52</sub> H <sub>98</sub> KN <sub>4</sub> O <sub>10</sub> PSi <sub>3</sub> Zr |
| Fw                                    | 610.21                                                             | 1184.90                                                                             |
| Cryst size, mm <sup>3</sup>           | 0.243 x 0.190 x 0.131                                              | 0.550 x 0.191 x 0.150                                                               |
| Cryst syst                            | Orthorhombic                                                       | Monoclinic                                                                          |
| Space group                           | <i>Pbca</i>                                                        | <i>P2<sub>1</sub>/n</i>                                                             |
| a, Å                                  | 19.9784(10)                                                        | 22.115(2)                                                                           |
| b, Å                                  | 15.4052(9)                                                         | 13.0823(10)                                                                         |
| c, Å                                  | 22.7205(13)                                                        | 24.036(2)                                                                           |
| α, °                                  | 90                                                                 | 90                                                                                  |
| β, °                                  | 90                                                                 | 115.107(14)                                                                         |
| γ, °                                  | 90                                                                 | 90                                                                                  |
| V, Å <sup>3</sup>                     | 6992.7(7)                                                          | 6296.7(12)                                                                          |
| Z                                     | 8                                                                  | 4                                                                                   |
| ρ <sub>calc</sub> g cm <sup>-3</sup>  | 1.159                                                              | 1.250                                                                               |
| μ, mm <sup>-1</sup>                   | 0.481                                                              | 0.376                                                                               |
| no. of reflections measd              | 30087                                                              | 36879                                                                               |
| no. of unique reflns, Rint            | 6160, 0.1582                                                       | 11090, 0.10902                                                                      |
| no. of reflns with $F^2 > 2s(F^2)$    | 3623                                                               | 8229                                                                                |
| transmn coeff range                   | 0.921-0.959                                                        | 0.880-0.958                                                                         |
| $R, R_w^a (F^2 > 2s(F^2))$            | 0.0754, 0.1513                                                     | 0.0942, 0.2372                                                                      |
| $R, R_w^a$ (all data)                 | 0.1291, 0.1729                                                     | 0.1174, 0.2616                                                                      |
| $S^a$                                 | 1.033                                                              | 1.084                                                                               |
| Parameters                            | 399                                                                | 667                                                                                 |
| max.,min. diff map, e Å <sup>-3</sup> | 0.857, -0.856                                                      | 2.907, -1.469                                                                       |

**Table S2. Selected bond lengths (Å) and angles (°) for Zr2 and Zr3.**

| <b>Zr2</b> |            |            |            |
|------------|------------|------------|------------|
| Zr1-P1     | 2.690(2)   | Zr1-N1     | 2.060(4)   |
| Zr1-N2     | 2.056(5)   | Zr1-N3     | 2.069(4)   |
| Zr1-N4     | 2.516(5)   | P1-H1A     | 1.425(10)  |
| P1-H1B     | 1.424(10)  | H1A-P1-H1B | 93.6(8)    |
| N1-Zr1-P1  | 105.68(14) | N1-Zr1-N3  | 112.72(19) |
| N1-Zr1-N4  | 74.49(17)  | N2-Zr1-P1  | 105.45(14) |
| N2-Zr1-N1  | 112.74(18) | N2-Zr1-N3  | 112.50(19) |
| N2-Zr1-N4  | 73.37(17)  | N3-Zr1-P1  | 107.04(14) |
| N3-Zr1-N4  | 73.96(17)  | N4-Zr1-P1  | 178.73(13) |
| Zr1-P1-H1A | 101.3(6)   | Zr1-P1-H1B | 101.2(6)   |
| <b>Zr3</b> |            |            |            |
| Zr1-P1     | 2.4723(17) | Zr1-N1     | 2.135(5)   |
| Zr1-N2     | 2.109(5)   | Zr1-N3     | 2.127(5)   |
| Zr1-N4     | 2.586(4)   | Zr1-H1     | 2.322(19)  |
| P1-H1      | 1.460(10)  |            |            |
| K1-O1      | 2.970(4)   | K1-O2      | 2.904(4)   |
| K1-O3      | 2.757(4)   | K1-O4      | 2.840(4)   |
| K1-O5      | 2.909(4)   | K1-O6      | 2.883(4)   |
| K1-O7      | 2.853(4)   | K1-O8      | 2.785(4)   |
| K1-O9      | 2.826(4)   | K1-O10     | 2.965(4)   |
| P1-Zr1-N4  | 179.76(12) | P1-Zr1-H1  | 35.3(3) .  |
| N1-Zr1-P1  | 107.92(13) | N1-Zr1-N4  | 72.31(15)  |
| N1-Zr1-H1  | 77.5(5)    | N2-Zr1-P1  | 107.30(13) |
| N2-Zr1-N1  | 107.64(19) | N2-Zr1-N3  | 110.19(17) |
| N2-Zr1-N4  | 72.58(16)  | N2-Zr1-H1  | 100.7(7)   |
| N3-Zr1-P1  | 107.87(13) | N3-Zr1-N1  | 115.61(18) |
| N3-Zr1-N4  | 72.01(16)  | N3-Zr1-H1  | 139.2(5)   |

## Density Functional Theory Calculations

### *General*

Restricted geometry optimisations were performed for the full models of **Zr2** and the anion component of **Zr3** (**Zr3<sup>-</sup>**) using coordinates derived from the X-ray crystal structures. No constraints were imposed on the structures during the geometry optimisations. The calculations were performed using the Amsterdam Density Functional (ADF) suite version 2012.01.<sup>4,5</sup> The DFT geometry optimisations employed Slater type orbital (STO) triple- $\zeta$ -plus polarisation all-electron basis sets (from the ZORA/TZP database of the ADF suite). Scalar relativistic approaches were used within the ZORA Hamiltonian for the inclusion of relativistic effects and the local density approximation (LDA) with the correlation potential due to Vosko et al<sup>6</sup> was used in all of the calculations. Gradient corrections were performed using the functionals of Becke<sup>7</sup> and Perdew.<sup>8</sup> MOLEKEL<sup>9</sup> was used to prepare the three-dimensional plot of the electron density. Natural Bond Order (NBO) analyses were carried out with NBO 5.0.<sup>10</sup> The Atoms in Molecules analysis<sup>11,12</sup> was carried out with Xaim-1.0.<sup>13</sup>

### *Selected Kohn Sham and NBO Orbitals for Zr2*

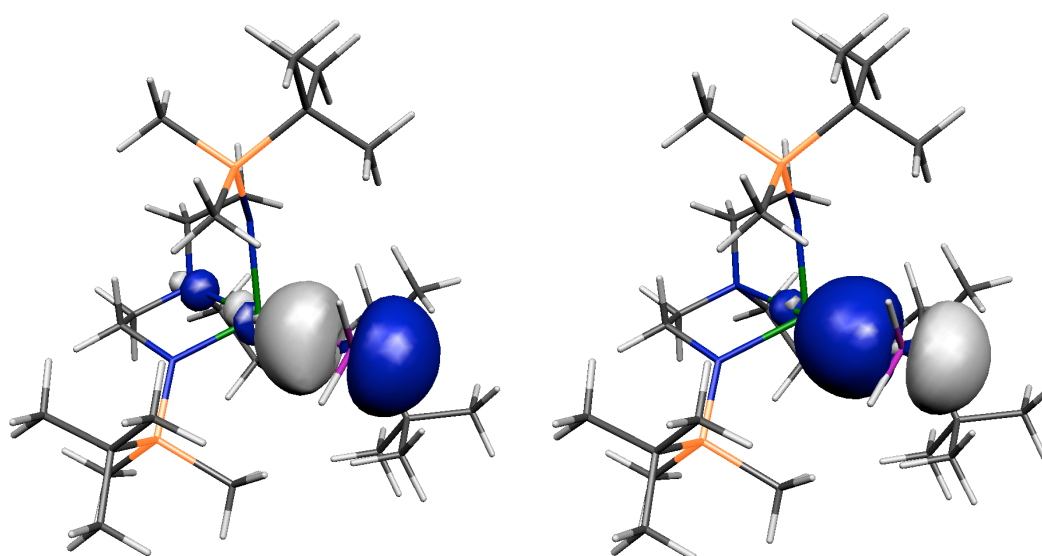

Left: HOMO (164, -4.655 eV). Right: NBO representation of the Zr-P  $\sigma$ -bond.

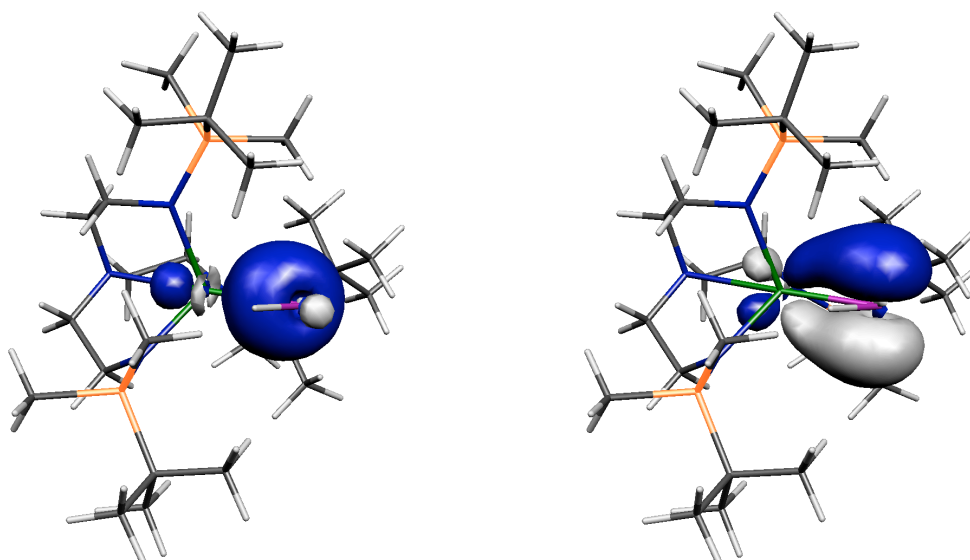

Left: NBO representation of the Zr-P  $\sigma$ -bond. Right: NBO representation of the Zr-P  $\pi$ -bond.

***Final Coordinates and Single Point Energy of Zr<sub>2</sub> After Geometry Optimisation***

|      |           |           |           |
|------|-----------|-----------|-----------|
| 1.C  | 2.763090  | 0.014749  | -3.893502 |
| 2.C  | -0.234003 | -1.805730 | -2.665710 |
| 3.C  | -2.114946 | -0.219023 | -2.400499 |
| 4.C  | 5.731710  | 0.131105  | -2.044271 |
| 5.C  | -1.465989 | 1.161970  | -2.266017 |
| 6.C  | -1.696647 | 4.740704  | -2.072285 |
| 7.C  | 4.661315  | -2.136119 | -1.863315 |
| 8.C  | 1.081800  | -2.005012 | -1.905781 |
| 9.C  | 4.558544  | -0.659545 | -1.419285 |
| 10.C | 2.803847  | 1.942136  | -1.534626 |
| 11.C | -2.037200 | -2.278204 | -1.035347 |
| 12.C | -3.994886 | 2.506063  | -0.631483 |
| 13.C | -1.580490 | 4.496566  | -0.550745 |
| 14.C | -0.108640 | 4.684820  | -0.127794 |
| 15.C | 4.673061  | -0.594174 | 0.117785  |
| 16.C | -2.450650 | 5.539867  | 0.187683  |
| 17.C | -2.304758 | -1.807791 | 0.396924  |
| 18.C | -0.936869 | -4.374315 | 1.864601  |
| 19.C | -2.141023 | 2.490905  | 1.789037  |
| 20.C | 1.372632  | -2.537225 | 2.559969  |
| 21.C | -2.879654 | -2.506397 | 3.967323  |
| 22.C | -1.373605 | -2.166294 | 4.034730  |
| 23.C | -1.215295 | -0.667877 | 4.365821  |
| 24.C | -0.721238 | -2.996918 | 5.163687  |
| 25.H | 3.638009  | 0.501247  | -4.353292 |
| 26.H | 2.719995  | -1.012188 | -4.286557 |
| 27.H | 1.868801  | 0.549566  | -4.250710 |
| 28.H | -2.316889 | -0.477629 | -3.457669 |



|      |           |           |           |
|------|-----------|-----------|-----------|
| 29.H | -0.055750 | -1.081161 | -3.471376 |
| 30.H | 5.710168  | 0.113050  | -3.145545 |
| 31.H | 4.581539  | -2.250132 | -2.955950 |
| 32.H | -0.586732 | -2.746540 | -3.129664 |
| 33.H | -0.536752 | 1.191778  | -2.861873 |
| 34.H | -2.138874 | 1.904669  | -2.724847 |
| 35.H | -1.048560 | 4.062948  | -2.647547 |
| 36.H | 6.694502  | -0.310913 | -1.729628 |
| 37.H | -2.728635 | 4.617738  | -2.436345 |
| 38.H | 1.837092  | -2.387698 | -2.611570 |
| 39.H | -1.386870 | 5.772801  | -2.316756 |
| 40.H | 5.638313  | -2.555989 | -1.563016 |
| 41.H | -3.077053 | -0.195508 | -1.871680 |
| 42.H | 3.584271  | 2.491525  | -2.083893 |
| 43.H | 5.736406  | 1.184393  | -1.722744 |
| 44.H | -4.144409 | 2.565935  | -1.719877 |
| 45.H | -2.973026 | -2.520248 | -1.574646 |
| 46.H | 3.883522  | -2.758136 | -1.395911 |
| 47.H | 1.834496  | 2.381526  | -1.817398 |
| 48.H | 0.952756  | -2.795461 | -1.145847 |
| 49.H | -1.430549 | -3.192372 | -0.985557 |
| 50.H | -4.621330 | 3.288464  | -0.174697 |
| 51.H | 0.553944  | 3.962954  | -0.626361 |
| 52.H | 0.238884  | 5.699182  | -0.394223 |
| 53.H | -4.387521 | 1.535020  | -0.290955 |
| 54.H | 2.952110  | 2.131141  | -0.462760 |
| 55.H | -2.109206 | 6.560657  | -0.061424 |
| 56.H | -3.512656 | 5.474647  | -0.095569 |
| 57.H | 5.619193  | -1.057138 | 0.450725  |
| 58.H | 4.668655  | 0.441337  | 0.488979  |
| 59.H | 3.848961  | -1.129173 | 0.611911  |
| 60.H | -2.971404 | -0.927664 | 0.376377  |
| 61.H | 0.028850  | 4.566903  | 0.957487  |
| 62.H | -0.350304 | -4.681679 | 0.984262  |
| 63.H | -2.865147 | -2.595193 | 0.926383  |
| 64.H | -2.385267 | 5.432504  | 1.281224  |
| 65.H | -1.999869 | -4.541462 | 1.636530  |
| 66.H | 1.880976  | -2.603450 | 1.584879  |
| 67.H | -2.345248 | 1.446066  | 2.070308  |
| 68.H | 2.599892  | 1.589905  | 1.505322  |
| 69.H | -2.924309 | 3.110265  | 2.252749  |
| 70.H | -1.181646 | 2.774506  | 2.241738  |
| 71.H | -0.670919 | -5.058788 | 2.685808  |
| 72.H | 0.844907  | 2.277512  | 2.358326  |
| 73.H | 1.688890  | -3.409894 | 3.152980  |
| 74.H | 1.733526  | -1.630861 | 3.064899  |
| 75.H | -3.398680 | -1.923547 | 3.190704  |
| 76.H | -1.706573 | -0.034537 | 3.612576  |
| 77.H | -3.055228 | -3.574710 | 3.765946  |
| 78.H | -0.159731 | -0.359618 | 4.418737  |

|       |           |           |           |
|-------|-----------|-----------|-----------|
| 79.H  | -3.367436 | -2.269257 | 4.930014  |
| 80.H  | -0.784582 | -4.081491 | 4.978247  |
| 81.H  | -1.679367 | -0.442063 | 5.343001  |
| 82.H  | 0.339707  | -2.737352 | 5.299740  |
| 83.H  | -1.233671 | -2.798813 | 6.122487  |
| 84.N  | -1.259486 | -1.243236 | -1.755919 |
| 85.N  | 1.483575  | -0.727742 | -1.276435 |
| 86.N  | -1.192314 | 1.446542  | -0.839422 |
| 87.N  | -1.018081 | -1.485491 | 1.050669  |
| 88.P  | 1.501182  | 1.013027  | 2.214513  |
| 89.Si | 2.874667  | 0.105269  | -1.990915 |
| 90.Si | -2.177376 | 2.711917  | -0.090433 |
| 91.Si | -0.508781 | -2.579623 | 2.353017  |
| 92.Zr | 0.076266  | 0.036502  | 0.088828  |

Energy: -492.01578420 eV

***Final Coordinates and Single Point Energy of Zr<sup>3+</sup> After Geometry Optimisation***

|      |           |           |           |
|------|-----------|-----------|-----------|
| 1.C  | 2.347394  | -2.654162 | -4.825652 |
| 2.C  | 1.647329  | -0.243522 | -4.750532 |
| 3.C  | -0.895694 | -2.641318 | -3.939772 |
| 4.C  | 1.985241  | -1.479722 | -3.890755 |
| 5.C  | 3.206446  | -1.149639 | -3.007394 |
| 6.C  | -1.107017 | 0.300294  | -2.614351 |
| 7.C  | -2.490677 | 0.342881  | -1.954953 |
| 8.C  | 0.951375  | -3.367815 | -1.626978 |
| 9.C  | 2.469830  | 2.702908  | -1.377683 |
| 10.C | 0.299283  | 4.825839  | -1.145875 |
| 11.C | -2.369732 | 2.269792  | -0.411144 |
| 12.C | -3.307575 | 0.121286  | 0.363105  |
| 13.C | 2.834531  | 5.507547  | 0.878729  |
| 14.C | -2.706674 | -1.209983 | 0.817414  |
| 15.C | -1.332260 | 2.685740  | 0.638199  |
| 16.C | 2.106568  | 4.217338  | 1.315120  |
| 17.C | 3.144640  | 3.217422  | 1.868957  |
| 18.C | -1.889158 | -4.294384 | 2.113230  |
| 19.C | 1.099851  | 4.562144  | 2.432288  |
| 20.C | 0.528827  | -3.870418 | 2.627081  |
| 21.C | -0.917581 | -3.589610 | 3.084001  |
| 22.C | -2.906584 | -1.401869 | 4.031726  |
| 23.C | 0.071536  | -0.799168 | 4.108005  |
| 24.C | -1.118332 | -4.176594 | 4.498099  |
| 25.H | 1.530157  | -2.895771 | -5.524251 |
| 26.H | 3.238164  | -2.401014 | -5.432626 |
| 27.H | 2.507235  | 0.028212  | -5.392389 |
| 28.H | 0.785578  | -0.420420 | -5.414874 |
| 29.H | -1.144736 | -1.982361 | -4.786421 |
| 30.H | 2.588076  | -3.568278 | -4.260151 |

|      |           |           |           |
|------|-----------|-----------|-----------|
| 31.H | -0.574147 | -3.606890 | -4.361681 |
| 32.H | 1.415898  | 0.628414  | -4.121253 |
| 33.H | 4.065782  | -0.847109 | -3.637393 |
| 34.H | -1.252241 | -0.008382 | -3.664868 |
| 35.H | -1.823740 | -2.823233 | -3.373644 |
| 36.H | -0.712501 | 1.333690  | -2.662698 |
| 37.H | 3.521771  | -2.012323 | -2.401783 |
| 38.H | -3.192301 | 0.984681  | -2.531148 |
| 39.H | 2.993965  | -0.331353 | -2.305933 |
| 40.H | 1.992091  | 2.315260  | -2.290543 |
| 41.H | 1.396322  | -4.200367 | -2.196357 |
| 42.H | -2.896197 | -0.678775 | -1.950817 |
| 43.H | -0.289873 | 4.415158  | -1.981665 |
| 44.H | 3.186416  | 3.484231  | -1.678815 |
| 45.H | 1.043574  | 5.515091  | -1.575577 |
| 46.H | 0.067899  | -3.755873 | -1.096225 |
| 47.H | -2.074574 | 2.710734  | -1.373362 |
| 48.H | 3.038256  | 1.877616  | -0.926744 |
| 49.H | 1.667129  | -3.021004 | -0.865136 |
| 50.H | -0.381130 | 5.428328  | -0.523382 |
| 51.H | 3.541249  | 5.322368  | 0.053369  |
| 52.H | -4.306811 | -0.021654 | -0.102440 |
| 53.H | -3.382799 | 2.651931  | -0.161101 |
| 54.H | -2.618278 | -1.876422 | -0.062582 |
| 55.H | 2.132470  | 6.290375  | 0.549533  |
| 56.H | 2.369025  | 0.203261  | 0.054928  |
| 57.H | 3.944554  | 3.019551  | 1.138875  |
| 58.H | -1.377599 | 3.785347  | 0.741819  |
| 59.H | -1.747624 | -3.942294 | 1.081552  |
| 60.H | 3.420337  | 5.921738  | 1.721680  |
| 61.H | -3.436293 | 0.756189  | 1.251218  |
| 62.H | -3.442899 | -1.697676 | 1.480414  |
| 63.H | -1.646308 | 2.289576  | 1.622928  |
| 64.H | 0.742634  | -3.432946 | 1.640869  |
| 65.H | -1.715165 | -5.387492 | 2.119511  |
| 66.H | 0.333423  | 5.280017  | 2.094619  |
| 67.H | -2.944807 | -4.129719 | 2.386266  |
| 68.H | 2.693074  | 2.246114  | 2.124558  |
| 69.H | 3.623445  | 3.626287  | 2.779751  |
| 70.H | 0.706187  | -4.961567 | 2.563394  |
| 71.H | 0.585298  | 3.660340  | 2.793977  |
| 72.H | 1.621842  | 5.020958  | 3.293779  |
| 73.H | 1.267128  | -3.454962 | 3.329384  |
| 74.H | -3.740044 | -2.032301 | 3.683439  |
| 75.H | 1.039775  | -0.773490 | 3.583771  |
| 76.H | -3.224720 | -0.349693 | 3.948942  |
| 77.H | -0.222370 | 0.244120  | 4.306656  |
| 78.H | -0.881277 | -5.258053 | 4.499444  |
| 79.H | -2.156288 | -4.066597 | 4.850515  |
| 80.H | -2.761168 | -1.618232 | 5.102665  |

|       |           |           |           |
|-------|-----------|-----------|-----------|
| 81.H  | -0.458207 | -3.698401 | 5.239591  |
| 82.H  | 0.199136  | -1.302792 | 5.080921  |
| 83.N  | -0.188894 | -0.586852 | -1.878641 |
| 84.N  | -2.382364 | 0.801277  | -0.557690 |
| 85.N  | 0.006898  | 2.192996  | 0.266010  |
| 86.N  | -1.401101 | -0.995237 | 1.469228  |
| 87.P  | 2.214689  | -0.874367 | 1.032653  |
| 88.Si | 0.461770  | -1.944635 | -2.769657 |
| 89.Si | 1.173271  | 3.408117  | -0.187120 |
| 90.Si | -1.256230 | -1.670398 | 3.080039  |
| 91.Zr | 0.058909  | 0.006720  | 0.202174  |

Energy: -489.69390901 eV

## References

1. C. Morton, I. J. Munslow, C. J. Sanders, N. W. Alcock, P. Scott, *Organometallics* **1999**, *18*, 4608.
2. R. Klement, G. Brauer, *Handbuch der Präparativen Anorganischen Chemie*, 3<sup>rd</sup> Ed, Ferdinand Enke Verlag, Stuttgart, **1975**, Issue 1, pp 516
3. P. J. Bailey, R. A. Coxall, C. M. Dick, S. Fabre, L. C. Henderson, C. Herber, S. T. Liddle, D. Loroño-González, A. Parkin, S. Parsons, *Chem. Eur. J.* **2003**, *9*, 4820.
4. C. Fonseca Guerra, J. G. Snijders, G. te Velde E. J. Baerends, *Theor. Chem. Acc.* **1998**, *99*, 391.
5. G. te Velde, F. M. Bickelhaupt, S. J. A. van Gisbergen, C. Fonseca Guerra, E. J. Baerends, J. G. Snijders T. Ziegler, *J. Comput. Chem.* **2001**, *22*, 931.
6. S. H. Vosko, L. Wilk, M. Nusair, *Can. J. Phys.* **1980**, *58*, 1200.
7. A. D. Becke, *Phys. Rev. A.* **1988**, *38*, 3098.
8. J. P. Perdew, *Phys. Rev. B.* **1986**, *33*, 8822.
9. S. Portmann, H. P. Luthi, *Chimia* **2000**, *54*, 766.
10. NBO 5.0: E. D. Glendening, J. K. Badenhoop, A. E. Reed, J. E. Carpenter, J. A. Bohmann, C. M. Morales, F. Weinhold, (Theoretical Chemistry Institute, University of Wisconsin, Madison, WI, 2001); <http://www.chem.wisc.edu/~nbo5>.
11. R. F. W. Bader, *Atoms in Molecules: A Quantum Theory*, Oxford University Press, New York, 1990.
12. R. F. W. Bader, *J. Phys. Chem. A.* **1998**, *102*, 7314.
13. <http://www.quimica.urv.es/XAIM>.
